# Supplementary material for: Analysis of DNA Methylation in a Three-Generation Family Reveals Widespread Genetic Influence on Epigenetic Regulation
Source: PubMed Central journal article supplement (PMC3154961; doi:10.1371/journal.pgen.1002228), 2011-08-11

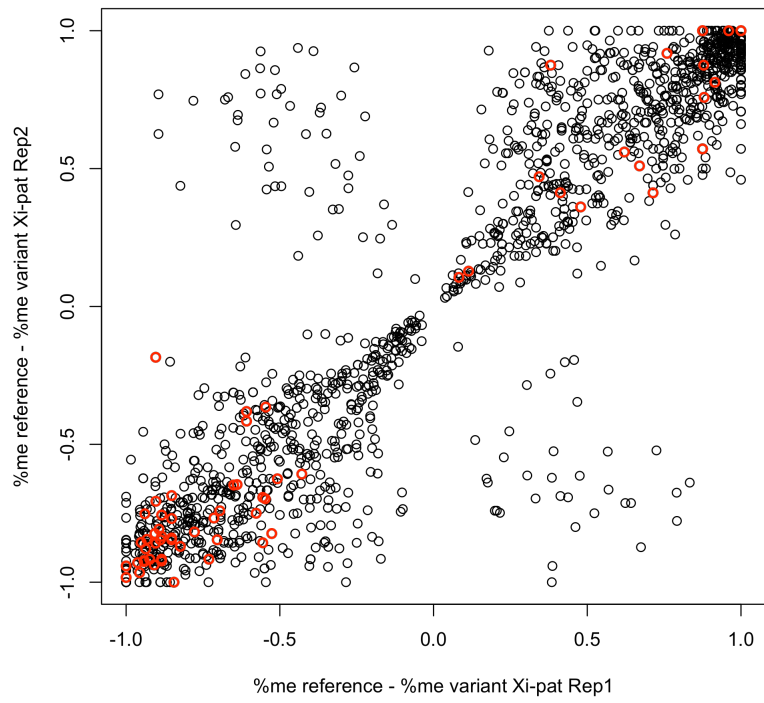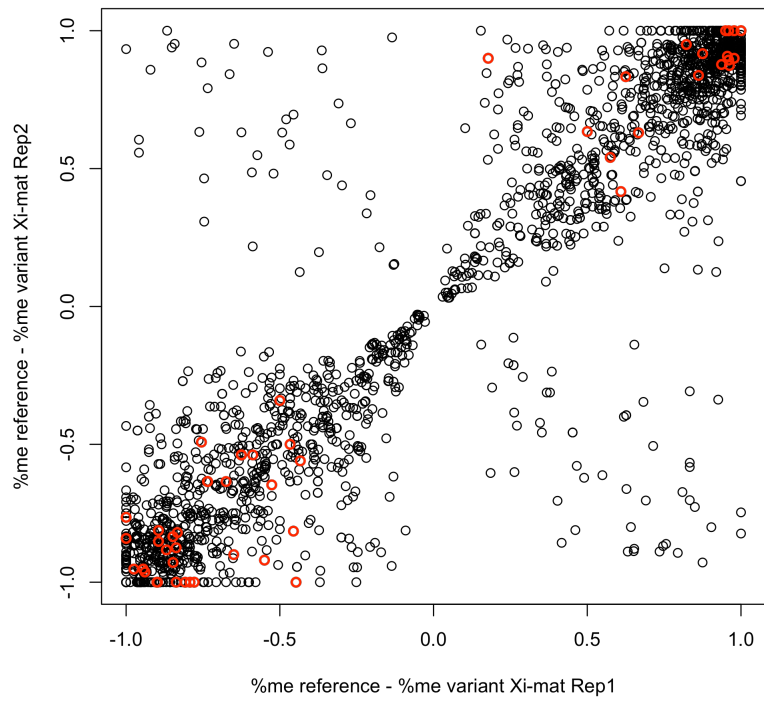

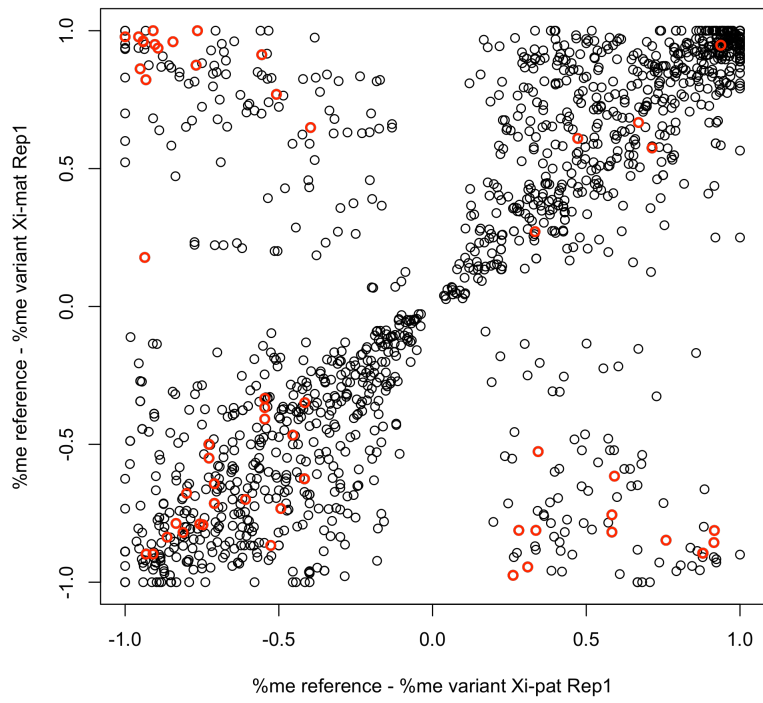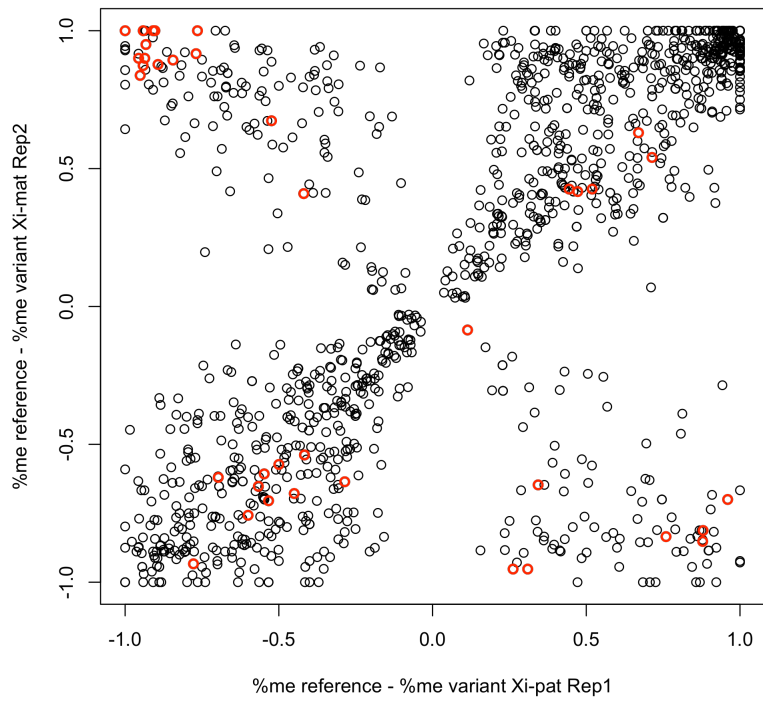

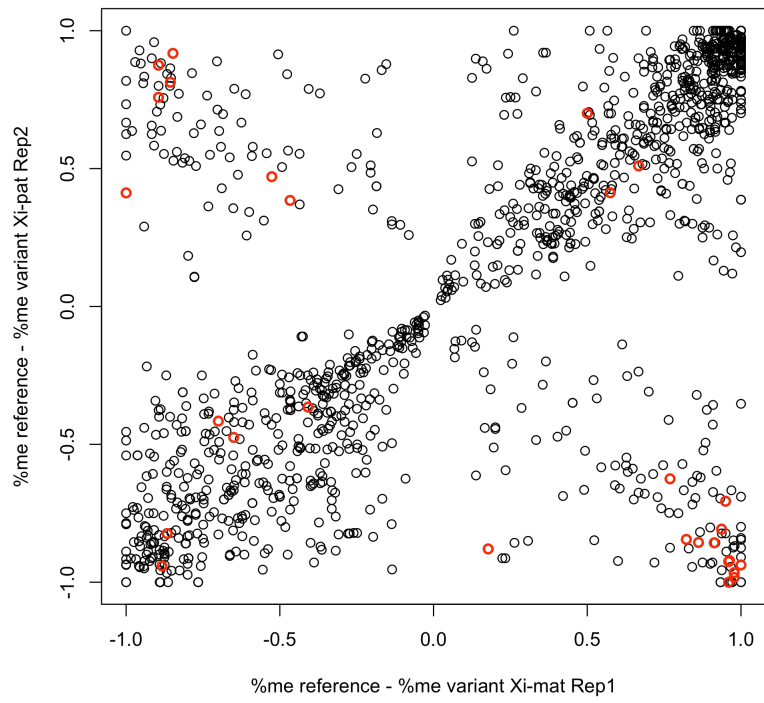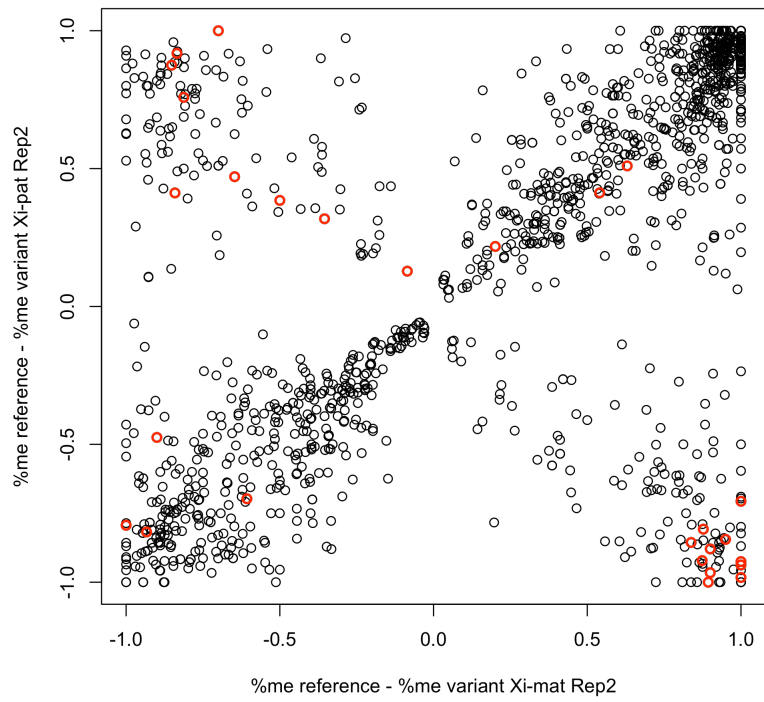

Supplement: pgen.1002228.s002.pdf [file pgen.1002228.s002.pdf]
