# Supplementary material for: Analysis of DNA Methylation in a Three-Generation Family Reveals Widespread Genetic Influence on Epigenetic Regulation
Source: PLoS Genet. 2011 Aug 11;7(8):e1002228. doi: 10.1371/journal.pgen.1002228 (PMC3154961; doi:10.1371/journal.pgen.1002228)
Supplement: Table S4 — Overlap between ASM and ASE. (XLS) [file pgen.1002228.s006.xls]

## Sheet: Sheet1
Table S4
RefSeq ID	Gene	Fraction of reads from allele with higher expression	Sanger validation (number of reads from higher expressed allele/total reads)	False Discovery Rate	Nearby CpGs with allele-specific methylation
NR_001435	HLA-DPB2	0.98	1 (44/44)	4.82e-29	chr6:33084984,chr6:33084990
NM_002508	NID1	0.89		1.32e-27	chr:236227319,chr1:236227324
NR_003937	HLA-DQB2	0.93		2.1e-20	chr6:32729814,chr6:32729820
NR_015377	LOC654433	1	0.91 (19/21)	4.47e-15	chr2:113993404,chr2:113993427
NR_026868	ANKRD19	0.98		4.34e-13	chr9:95570586
NM_001145137	CPT1B	0.66		1.09e-06	chr22:51016513,chr22:51016516
NM_001079803	GAA	0.77	0.82 (32/39)	1.22e-05	chr17:78079643
NM_203468	ENTPD2	1		0.000366	chr9:139948919
NM_207344	SPRYD4	0.87		0.000755	chr12:56862981
NM_199054	MKNK2	0.59		0.00678	chr19:2046303
NM_147150	PALM2-AKAP2	0.58		0.0107	chr9:112542540
NM_001009880	C22orf9	0.86		0.0123	chr22:45636255
NM_016564	CEND1	0.85		0.0288	chr11:787675
NM_003433	ZNF132	0.92	0.69 (11/16)	0.0356	chr19:58951129
NM_018215	PNMAL1	0.99		0.0389	chr19:46974662
NM_001002762	DNAJB12	0.67		0.0422	chr10:74113177
NM_021090	MTMR3	0.68		0.0482	chr22:30279613,chr22:30279641
NM_002353	TACSTD2	0.77		0.0486	chr1:59042783,chr1:59042850,chr1:59042854,chr1:59042856,chr1:59042860,chr1:59042869,chr1:59042870,chr1:59042871,chr1:59042872,chr1:59042879,chr1:59042880,chr1:59042882,chr1:59042883,chr1:59042897
NM_000217	KCNA1	0.75		0.0611	chr12:5020533,chr12:5020548
NM_001142298	SQSTM1	0.56		0.065	chr5:179232618,chr5:179232637,chr5:179232642
NM_003086	SNAPC4	0.62		0.0817	chr9:139293870
NM_004477	FRG1	0.56		0.117	chr4:190862341,chr4:190862357
NM_032287	LDOC1L	0.63		0.124	chr22:44893855
NM_004327	BCR	0.63		0.131	chr22:23523625
NM_001025236	TSPAN4	0.75		0.139	chr11:843485
NM_080916	DGUOK	0.55		0.155	chr2:74154255
NM_001082480	ZNF623	0.66		0.21	chr8:144716677
NM_022338	C11orf24	0.58		0.211	chr11:68039501
NM_006602	TCFL5	0.71		0.282	chr20:61492235
NM_024734	CLMN	0.62		0.312	chr14:95786663,chr14:95786667
NM_001040439	MAPK8IP3	0.56		0.34	chr16:1761032
NM_004419	DUSP5	0.58		0.351	chr10:112255700
NR_002822	MGC72080	0.65		0.411	chr7:97601525,chr7:97601536,chr7:97601548
NM_021259	TMEM8A	0.56		0.411	chr16:427912
NM_002751	MAPK11	0.7		0.453	chr22:50706364,chr22:50706374,chr22:50706386,chr22:50706390
NM_006675	TSPAN9	0.7		0.453	chr12:3186896
NM_017790	RGS3	0.62		0.47	chr9:116226089
NM_001079512	FAM18A	0.71		0.507	chr16:10912405
NM_031498	GNGT2	0.59		0.522	chr17:47284683
NM_007221	PMF1	0.56		0.554	chr1:156186375,chr1:156186377,chr1:156186379,chr1:156186383,chr1:156186387,chr1:156186392,chr1:156186399
NM_017434	DUOX1	0.69		0.627	chr15:45422285
NM_033429	CALML4	0.64		0.644	chr15:68498047
NM_030582	COL18A1	0.64		0.644	chr21:46876304,chr21:46879688,chr21:46879692
NM_130445	COL18A1	0.64		0.644	chr21:46825792,chr21:46825794
NM_013267	GLS2	0.64		0.644	chr12:56882578
NM_175875	SIX5	0.61		0.653	chr19:46271156,chr19:46271158,chr19:46271185
NM_153188	TNPO1	0.55		0.653	chr5:72144701
NM_144775	SMCR8	0.61		0.687	chr17:18218838
NM_152441	FBXL14	0.61		0.687	chr12:1703699
NM_001017535	VDR	0.6		0.714	chr12:48299419
NM_001161708	SYNC	0.52		0.742	chr1:33168337
NM_001145443	PFKFB3	0.54		0.774	chr10:6187760,chr10:6187769,chr10:6187776,chr10:6187791
NM_018518	MCM10	0.57		0.785	chr10:13203750
NM_005662	VDAC3	0.52		0.789	chr8:42248924
NM_014608	CYFIP1	0.54		0.804	chr15:22893089
NM_001163922	VSIG10L	0.66		0.817	chr19:51843838,chr19:51843841,chr19:51843852,chr19:51843854,chr19:51843858
NM_014746	RNF144A	0.56		0.841	chr2:7057188,chr2:7057200
NM_000101	CYBA	0.51		0.841	chr16:88713511
NM_003755	EIF3G	0.51		0.891	chr19:10229296
NM_175907	ZADH2	0.53		0.894	chr18:72916693
NM_002949	MRPL12	0.52		0.896	chr17:79668664,chr17:79668668
NM_022772	EPS8L2	0.59		0.912	chr11:705296
NM_020713	ZNF512B	0.53		0.923	chr20:62597665
NM_005112	WDR1	0.51		0.923	chr4:10117933
NM_001670	ARVCF	0.62		0.975	chr22:20003609
NM_053056	CCND1	0.62		0.975	chr11:69456824
NM_017723	C9orf167	0.6		0.989	chr9:140175763
NM_058192	RPUSD1	0.53		0.996	chr16:836969,chr16:836990,chr16:837001
NM_152652	ZNF48	0.55		1	chr16:30406410
NM_004686	MTMR7	0.54		1	chr8:17270624
NM_004474	FOXD2	0.57		1	chr1:47904555
NM_014567	BCAR1	0.53		1	chr16:75285318
NM_004296	RGS6	0.54		1	chr14:72399327,chr14:72399347
NM_001823	CKB	0.54		1	chr14:103989552,chr14:103989562,chr14:103989571,chr14:103989582
NM_198595	AFAP1	0.5		1	chr4:7940644
NM_016074	BOLA1	0.5		1	chr1:149871886,chr1:149871887
NM_016246	HSD17B14	0.54		1	chr19:49340849,chr19:49340860
NM_024693	ECHDC3	0.54		1	chr10:11784299
NM_017818	WDR8	0.5		1	chr1:3567672,chr1:3567674
NM_003777	DNAH11	0.51		1	chr7:21582921
NM_001111077	EZR	0.51		1	chr6:159240444,chr6:159240452
NM_017712	PGPEP1	0.51		1	chr19:18455474,chr19:18455475,chr19:18455480,chr19:18455481
NM_030961	TRIM56	0.51		1	chr7:100731504
