# Supplementary material for: Analysis of DNA Methylation in a Three-Generation Family Reveals Widespread Genetic Influence on Epigenetic Regulation
Source: PLoS Genet. 2011 Aug 11;7(8):e1002228. doi: 10.1371/journal.pgen.1002228 (PMC3154961; doi:10.1371/journal.pgen.1002228)
Supplement: Table S5 — Distribution of nucleotides in ASM SNPs. (XLS) [file pgen.1002228.s007.xls]

## Sheet: Sheet1
Table S5
SNP	Frequency
A>G	0.133945
A>T	0.0744186
G>A	0.290719
G>T	0.16949
T>A	0.0648603
T>G	0.266567
